# Supplementary material for: A Novel Approach for Investigating Upper Airway Hyperresponsiveness Using Micro-CT in Eosinophilic Upper Airway Inflammation such as Allergic Rhinitis Model
Source: Biomolecules. 2019 Jun 27;9(7):252. doi: 10.3390/biom9070252 (PMC6681309; doi:10.3390/biom9070252)
Supplement: Supplementary file 1 [file biomolecules-09-00252-s001.pdf]

1 **ONLINE SUPPLEMENT**

2 **SUPPLEMENTARY FIGURE LEGENDS**

3 ***Figure S1 Protocol of OVA-induced AR and histology***

4 **A** indicates protocol schema for OVA-induced AR. **B** shows H&E stain (upper panel)  
5 and immunofluorescence images (lower panel). White arrows indicate eosinophil  
6 (stained by red).

7 ***Figure S2 Analysis of swelling of nasal mucosa using micro-CT images in coronal axis***

8 **A** and **B** show dose-dependent and kinetics analyses, respectively. Mucosa index was  
9 analyzed 15 min after PBS or 0.5–2.0 mg/mL MCh treatment (**A**) or 0, 15, 60, and 120 min  
10 after PBS or 1 mg/mL MCh treatment (**B**). Data are expressed as means  $\pm$  SEMs (n = 3–6  
11 for each group). \*Significantly different from PBS-treated mice ( $P < 0.05$ )

12 ***Figure S3 The effect on mucosa index by OVA treatment***

13 Mucosa index was analyzed 15 min after PBS or 1% OVA treatment in healthy control and  
14 OVA-induced allergic rhinitis group (n = 3 for each group). Data are expressed as means  $\pm$   
15 SEMs (n = 3 in each group). n.s.: not significant

16 ***Figure S4 Schema of relationship between measurement system and airway***  
17 ***hyperresponsiveness in allergic rhinitis and asthma***

**A.**

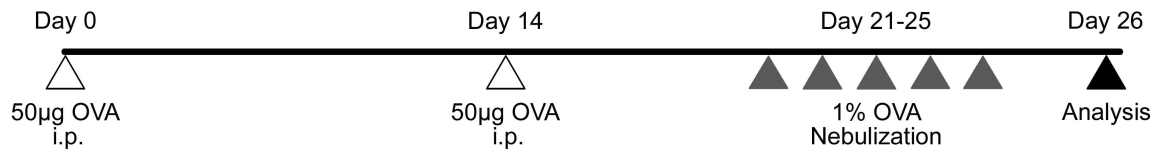

**B.**

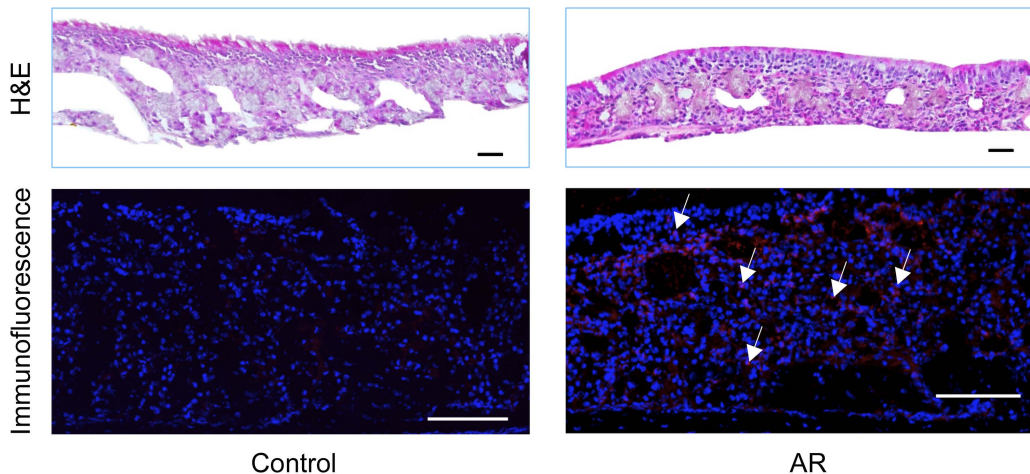

*Fig.S1 Bui et al*

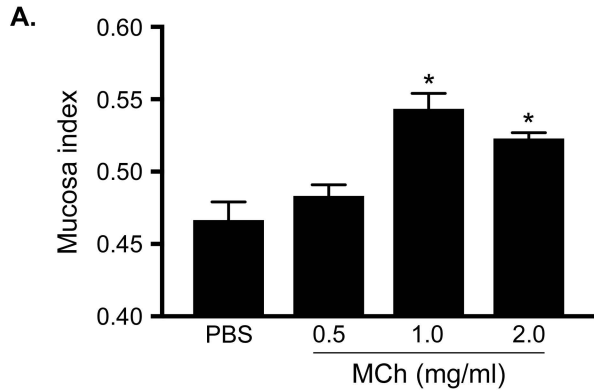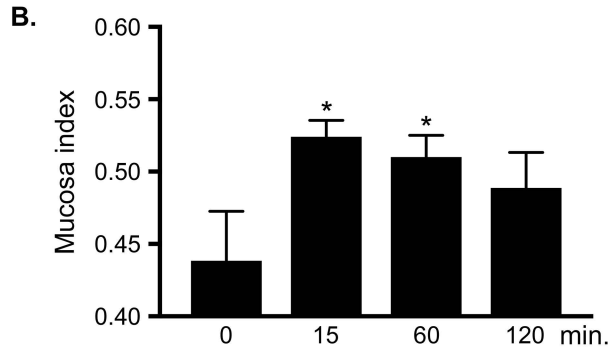

*Fig.S2 Bui et al*

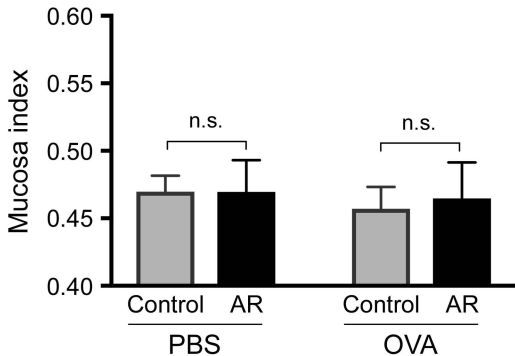

*Fig.S3 Bui et al*

Specific or nonspecific stimulants

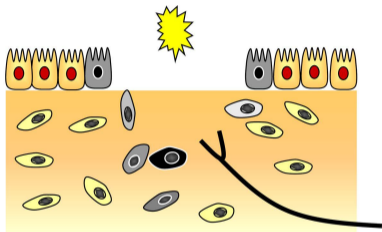

Airway hyperresponsiveness

Our novel approach using micro-CT

Allergic rhinitis

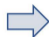

Swelling of nasal mucosa

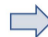

Upper airway resistance

Nasal discharge

Asthma

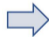

Contraction of smooth muscle

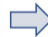

Lower airway resistance

Non-invasive plethysmography

Invasive plethysmography

Fig.S4 Bui et al
